# Supplementary material for: Effects of Fish Oil on Biomarkers of Axonal Injury and Inflammation in American Football Players: A Placebo-Controlled Randomized Controlled Trial
Source: MDPI journal article supplement (doi:10.3390/nu14102139), 2022-05-20
Supplement: s1 [file s1]

**Table S2.** Mean plasma fatty acid concentrations as a percent of total by treatment and time.

|          |                 | Timepoint 1 |         | Timepoint 2 |         | Timepoint 3 |         | Timepoint 4 |         | Timepoint 5 |         | Timepoint 6 |         | Timepoint 7 |         |
|----------|-----------------|-------------|---------|-------------|---------|-------------|---------|-------------|---------|-------------|---------|-------------|---------|-------------|---------|
| FA       | Common Name     | Treatment   | Placebo |
| C14:0    | Myristic        | 0.75        | 0.66    | 0.67        | 0.82    | 0.80        | 0.84    | 0.66        | 0.81    | 0.69        | 0.72    | 0.72        | 0.88    | 0.73        | 0.90    |
| C15:0    | Pentadecanoic   | 0.21        | 0.20    | 0.23        | 0.24    | 0.21        | 0.21    | 0.21        | 0.21    | 0.21        | 0.20    | 0.20        | 0.21    | 0.20        | 0.23    |
| C15:1    | n-Pentadecanoic | 0.10        | 0.11    | 0.11        | 0.12    | 0.11        | 0.12    | 0.11        | 0.12    | 0.09        | 0.12    | 0.10        | 0.11    | 0.08        | 0.11    |
| C16:0    | Palmitic        | 20.38       | 20.62   | 20.66       | 21.35   | 20.57       | 20.58   | 20.26       | 20.38   | 19.95       | 20.35   | 20.23       | 21.08   | 20.24       | 21.66   |
| C16:1    | Palmitoleic     | 0.96        | 0.83    | 0.97        | 0.88    | 0.88        | 0.92    | 0.76        | 0.82    | 0.90        | 0.75    | 0.90        | 0.96    | 0.94        | 0.86    |
| C17:1    | Heptadecanoic   | 0.12        | 0.14    | 0.18        | 0.19    | 0.15        | 0.18    | 0.13        | 0.16    | 0.14        | 0.14    | 0.11        | 0.16    | 0.13        | 0.15    |
| C18:0    | Stearic         | 7.61        | 7.32    | 7.42        | 7.48    | 7.24        | 7.70    | 7.43        | 7.48    | 7.59        | 7.51    | 7.91        | 7.55    | 7.37        | 7.12    |
| C18:1cis | Oleic           | 19.01       | 18.08   | 18.35       | 19.56   | 17.95       | 20.13   | 17.39       | 19.50   | 19.09       | 18.53   | 18.28       | 19.10   | 18.99       | 17.58   |
| C18:1n7  | Vaccenic        | 1.11        | 1.14    | 1.02        | 1.15    | 0.90        | 0.94    | 1.13        | 0.96    | 0.97        | 1.16    | 1.09        | 1.04    | 1.01        | 1.05    |
| C18:2n6  | LA              | 34.50       | 35.22   | 32.64       | 32.41   | 34.96       | 32.84   | 35.46       | 34.34   | 34.52       | 34.96   | 35.36       | 33.46   | 35.56       | 34.55   |
| C18:3n3  | ALA             | 0.74        | 0.80    | 0.59        | 0.61    | 0.78        | 0.66    | 0.67        | 0.76    | 0.63        | 0.72    | 0.69        | 0.84    | 0.89        | 0.83    |
| C18:3n6  | GLA             | 0.37        | 0.35    | 0.28        | 0.35    | 0.30        | 0.40    | 0.31        | 0.45    | 0.37        | 0.41    | 0.42        | 0.57    | 0.41        | 0.45    |
| C18:4n3  | Stearidonic     | 0.07        | 0.06    | 0.06        | 0.08    | 0.08        | 0.07    | 0.04        | 0.08    | 0.07        | 0.04    | 0.08        | 0.06    | 0.07        | 0.06    |

|         |                           |      |      |      |      |      |      |      |      |      |      |      |      |      |      |
|---------|---------------------------|------|------|------|------|------|------|------|------|------|------|------|------|------|------|
| C20:1   | Ei-<br>cosenoic           | 0.16 | 0.13 | 0.15 | 0.14 | 0.17 | 0.16 | 0.15 | 0.15 | 0.16 | 0.16 | 0.15 | 0.14 | 0.17 | 0.14 |
| C20:2   | Eicosadi-<br>enoic        | 0.30 | 0.29 | 0.27 | 0.29 | 0.27 | 0.31 | 0.27 | 0.31 | 0.28 | 0.30 | 0.29 | 0.31 | 0.30 | 0.30 |
| C20:3n3 | Eico-<br>satetra-<br>noic | 0.06 | 0.12 | 0.08 | 0.12 | 0.11 | 0.11 | 0.08 | 0.10 | 0.07 | 0.11 | 0.06 | 0.12 | 0.05 | 0.13 |
| C20:3n6 | DGLA                      | 1.26 | 1.23 | 1.28 | 1.14 | 1.16 | 1.28 | 1.23 | 1.40 | 1.20 | 1.32 | 1.22 | 1.34 | 1.22 | 1.36 |
| C20:4n6 | ARA                       | 8.83 | 8.85 | 8.76 | 9.23 | 7.96 | 8.66 | 7.82 | 8.20 | 7.91 | 8.75 | 7.81 | 8.41 | 8.08 | 8.55 |
| C20:5n3 | EPA                       | 0.38 | 0.47 | 1.53 | 0.46 | 1.02 | 0.42 | 1.30 | 0.50 | 0.97 | 0.49 | 0.72 | 0.49 | 0.39 | 0.53 |
| C22:5n3 | DPA-n3                    | 0.46 | 0.48 | 0.52 | 0.47 | 0.45 | 0.47 | 0.45 | 0.47 | 0.46 | 0.47 | 0.41 | 0.46 | 0.44 | 0.50 |
| C22:5n6 | DPA-n6                    | 0.19 | 0.19 | 0.12 | 0.23 | 0.09 | 0.22 | 0.09 | 0.20 | 0.12 | 0.20 | 0.07 | 0.21 | 0.13 | 0.21 |
| C22:6n3 | DHA                       | 1.29 | 1.66 | 3.08 | 1.68 | 2.75 | 1.67 | 2.88 | 1.57 | 2.55 | 1.60 | 2.14 | 1.44 | 1.59 | 1.70 |

Significant differences in plasma concentrations across time and group were seen. FA, fatty acid; LA linoleic acid; ALA,  $\alpha$ -linolenic acid; GLA,  $\gamma$ -Linolenic acid; DGLA, dihomo- $\gamma$ -linolenic acid; ARA, arachidonic acid; EPA, eicosapentaenoic acid, DPA-n3, docosapentaenoic-n3; DPA-n6, docosapentaenoic-n6; DHA, docosahexaenoic acid
