# Supplementary material for: Effects of Fish Oil on Biomarkers of Axonal Injury and Inflammation in American Football Players: A Placebo-Controlled Randomized Controlled Trial
Source: MDPI journal article supplement (doi:10.3390/nu14102139), 2022-05-20
Supplement: s1 [file s1]

**Table S1.** Fatty acid profile of fish oil supplement and placebo.

| Figure .              | DHA+EPA<br>(% total) | DHA+EPA (mg<br>FA/g oil)* | Placebo<br>(% total) | Placebo<br>(mg FA/g oil)* |
|-----------------------|----------------------|---------------------------|----------------------|---------------------------|
| Myristic (C14:0)      | 0.610                |                           | 0.000                |                           |
| Palmitic (C16:0)      | 1.710                |                           | 5.647                |                           |
| Palmitoleic (C16:1)   | 0.901                |                           | 0.000                |                           |
| Stearic (C18:0)       | 1.138                |                           | 3.075                |                           |
| Oleic (C18:1n9cis)    | 1.090                | 8.3                       | 78.170               | 713                       |
| C18:1n11cis           | 0.298                |                           | 0.858                |                           |
| LA (C18:2n6cis)       | 0.000                | 0                         | 12.976               | 14.2                      |
| GLA (C18:3n6)         | 0.381                |                           | 0.000                |                           |
| ALA (C18:3n3)         | 0.000                |                           | 0.000                |                           |
| Stearidonic (C18:4n3) | 0.212                |                           | 0.000                |                           |
| Arachidic (C20:0)     | 0.734                |                           | 0.000                |                           |
| C20:1n9               | 1.483                |                           | 0.000                |                           |
| C20:2n6               | 0.320                |                           | 0.000                |                           |
| DGLA C20:3n6          | 0.365                |                           | 0.000                |                           |
| ARA (C20:4n6)         | 1.500                |                           | 0.000                |                           |
| (C20:4n3)             | 1.080                |                           | 0.000                |                           |
| EPA (C20:5n3)         | 22.000               | 170.5                     | 0.000                | 0                         |
| Behenic (C22:0)       | 0.630                |                           | 0.000                |                           |
| Euricic (C22:1n9)     | 0.781                |                           | 0.000                |                           |
| Arsenic (C22:4n6)     | 0.561                |                           | 0.000                |                           |
| C22:5n6               | 2.010                |                           | 0.000                |                           |
| DPA (C22:5n3)         | 6.790                |                           | 0.000                |                           |
| DHA (C22:6n3)         | 53.440               | 407                       | 0.000                | 0                         |
| C24:1n9               | 1.5830               |                           | 0.223                |                           |
| Total                 | 100                  |                           | 100                  |                           |

\*Fatty acid concentrations (mg FA/g oil) were used to calculate daily supplement dose. FA fatty acid; LA linoleic acid; GLA,  $\gamma$ -Linolenic acid; ALA,  $\alpha$ -linolenic acid; DGLA, dihomogamma-linolenic acid; ARA, arachidonic acid; EPA, eicosapentaenoic acid, DPA, docosapentaenoic; DHA, docosahexaenoic acid. Fatty acid composition was determined as described in section "Plasma fatty acid characterization".
